# Supplementary material for: Vaccine Based on Recombinant Fusion Protein Combining HBV PreS with SARS-CoV-2 Wild-Type- and Omicron-Derived RBD Strongly Induces Omicron-Neutralizing Antibodies
Source: Preprints.org preprint supplement (doi:10.20944/preprints202401.1187.v1), 2024-01-16
Supplement: Supplementary file 3 [file supplementary]

**Supplemental figures**

Vaccine based on recombinant fusion protein combining HBV PreS with SARS-CoV-2 wild-type- and Omicron-derived RBD strongly induces Omicron-neutralizing antibodies

Pia Gattinger 1, Bernhard Kratzer 2, Al Nasar Ahmed Sehgal 2, Anna Ohradanova-Repic 3, Laura Gebetsberger 3, Gabor Tajti 3, Margarete Focke-Tejkl 1,4, Mirjam Schaar 1, Verena Fuhrmann 1, Lukas Petrowitsch 5, Walter Keller 5, Sandra Högler 6, Hannes Stockinger 3, Winfried F. Pickl 2 and Rudolf Valenta 1,4,7,8*

|  |
| --- |

1 Medical University of Vienna, Center for Pathophysiology, Infectiology and Immunology, Department of Pathophysiology and Allergy Research, Division of Immunopathology, Vienna, Austria;

2 Medical University of Vienna, Center for Pathophysiology, Infectiology and Immunology, Institute of Immunology, Vienna, Austria;

3 Medical University of Vienna, Center for Pathophysiology, Infectiology and Immunology, Institute for Hygiene and Applied Immunology, Vienna, Austria;

4 Karl Landsteiner University of Health Sciences, Krems, Austria;

5 University of Graz, BioTechMed Graz, Institute of Molecular Biosciences, Graz, Austria;

6 University of Veterinary Medicine Vienna, Institute of Pathology, Unit of Laboratory Animal Pathology, Vienna, Austria;

7 Sechenov First Moscow State Medical University, Department of Clinical Immunology and Allergology, Laboratory for Immunopathology, Moscow, Russia

8 NRC Institute of Immunology FMBA of Russia, Moscow, Russia

***** Correspondence: rudolf.valenta@meduniwien.ac.at

**
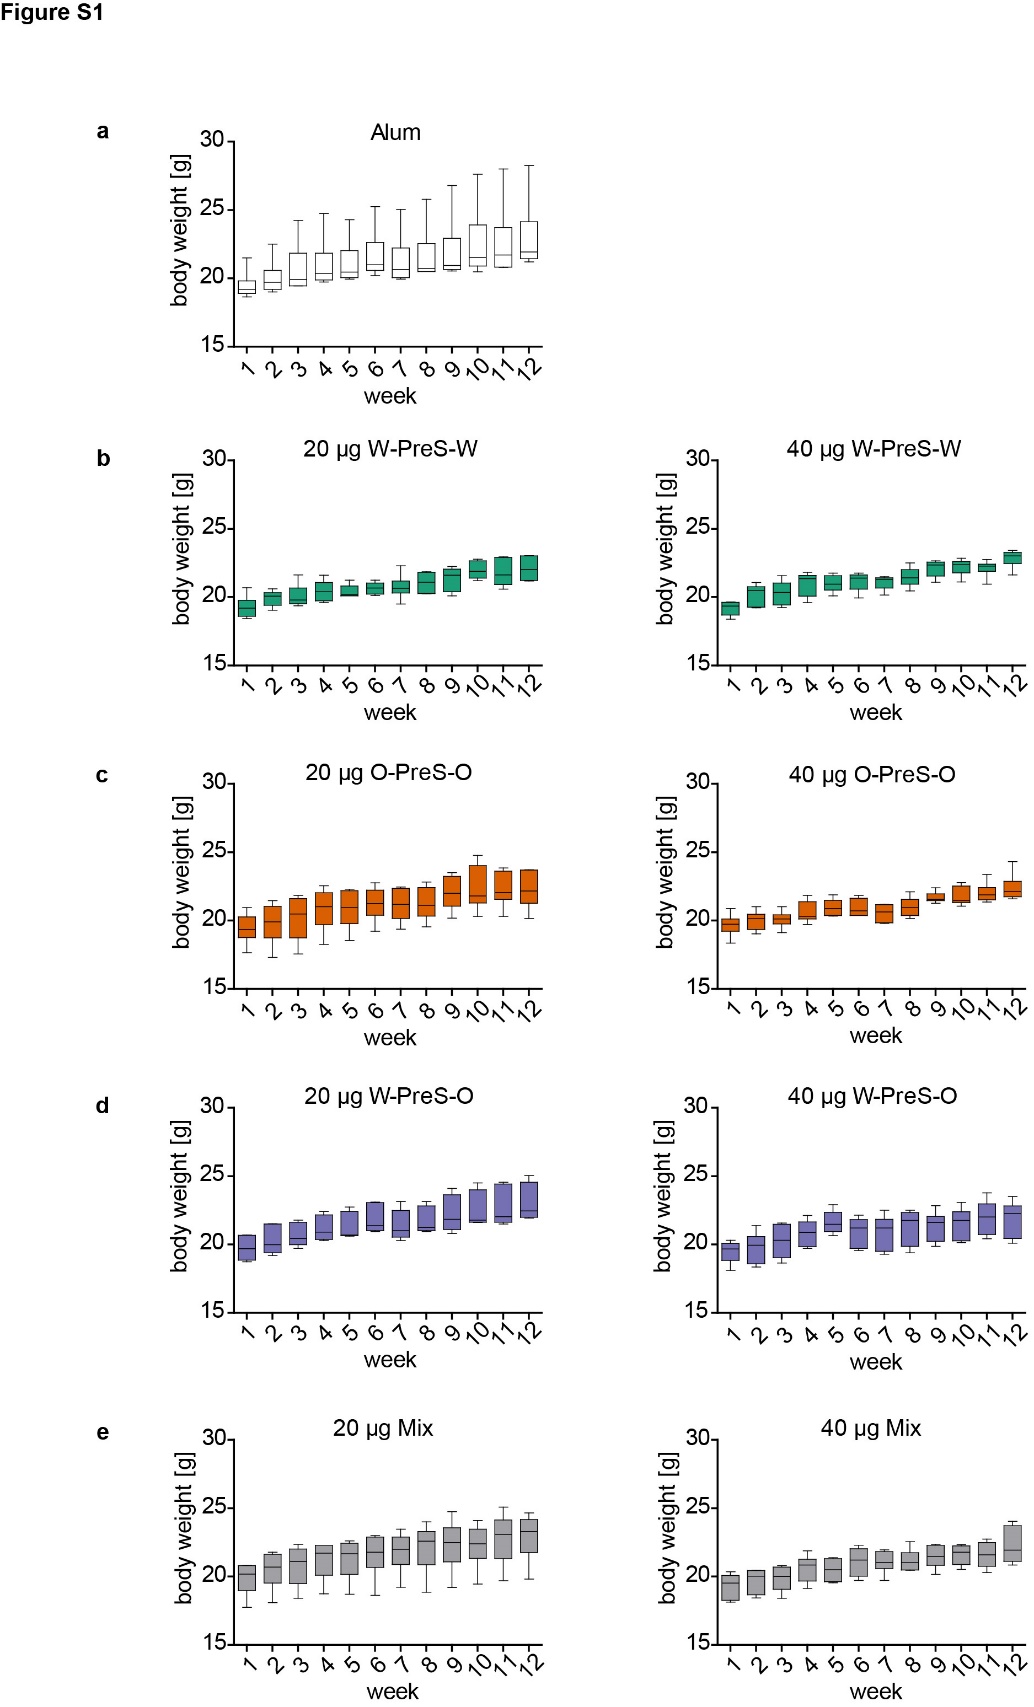
**

**Figure S1.** Weight development of mice immunized with **(a)** alum alone (negative control) or with 20 µg or 40 µg of the PreS-RBD fusion proteins **(b-e)** as measured weekly (x-axes) as gram body weight (y-axes). Shown are box-plots for each group (n=6 mice per group) with minimum and maximum values and medians indicated.

**
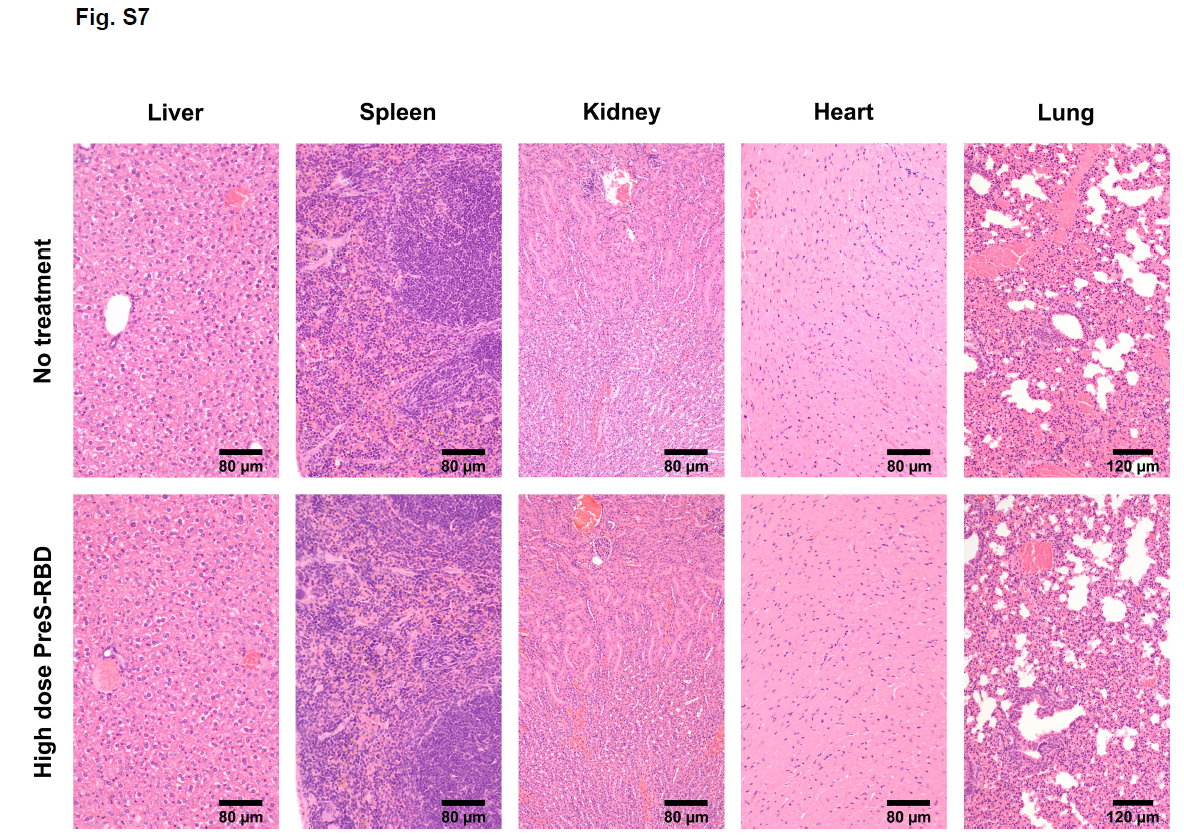
**

**Figure S2.** Representative hematoxylin–eosin stains of liver, spleen, kidney, heart and lung sections obtained from a non-immunized mouse (upper panel) or a mouse immunized with 40 µg of the mixture of W-PreS-W and O-PreS-O (high dose of PreS-RBD, lower panel).

**
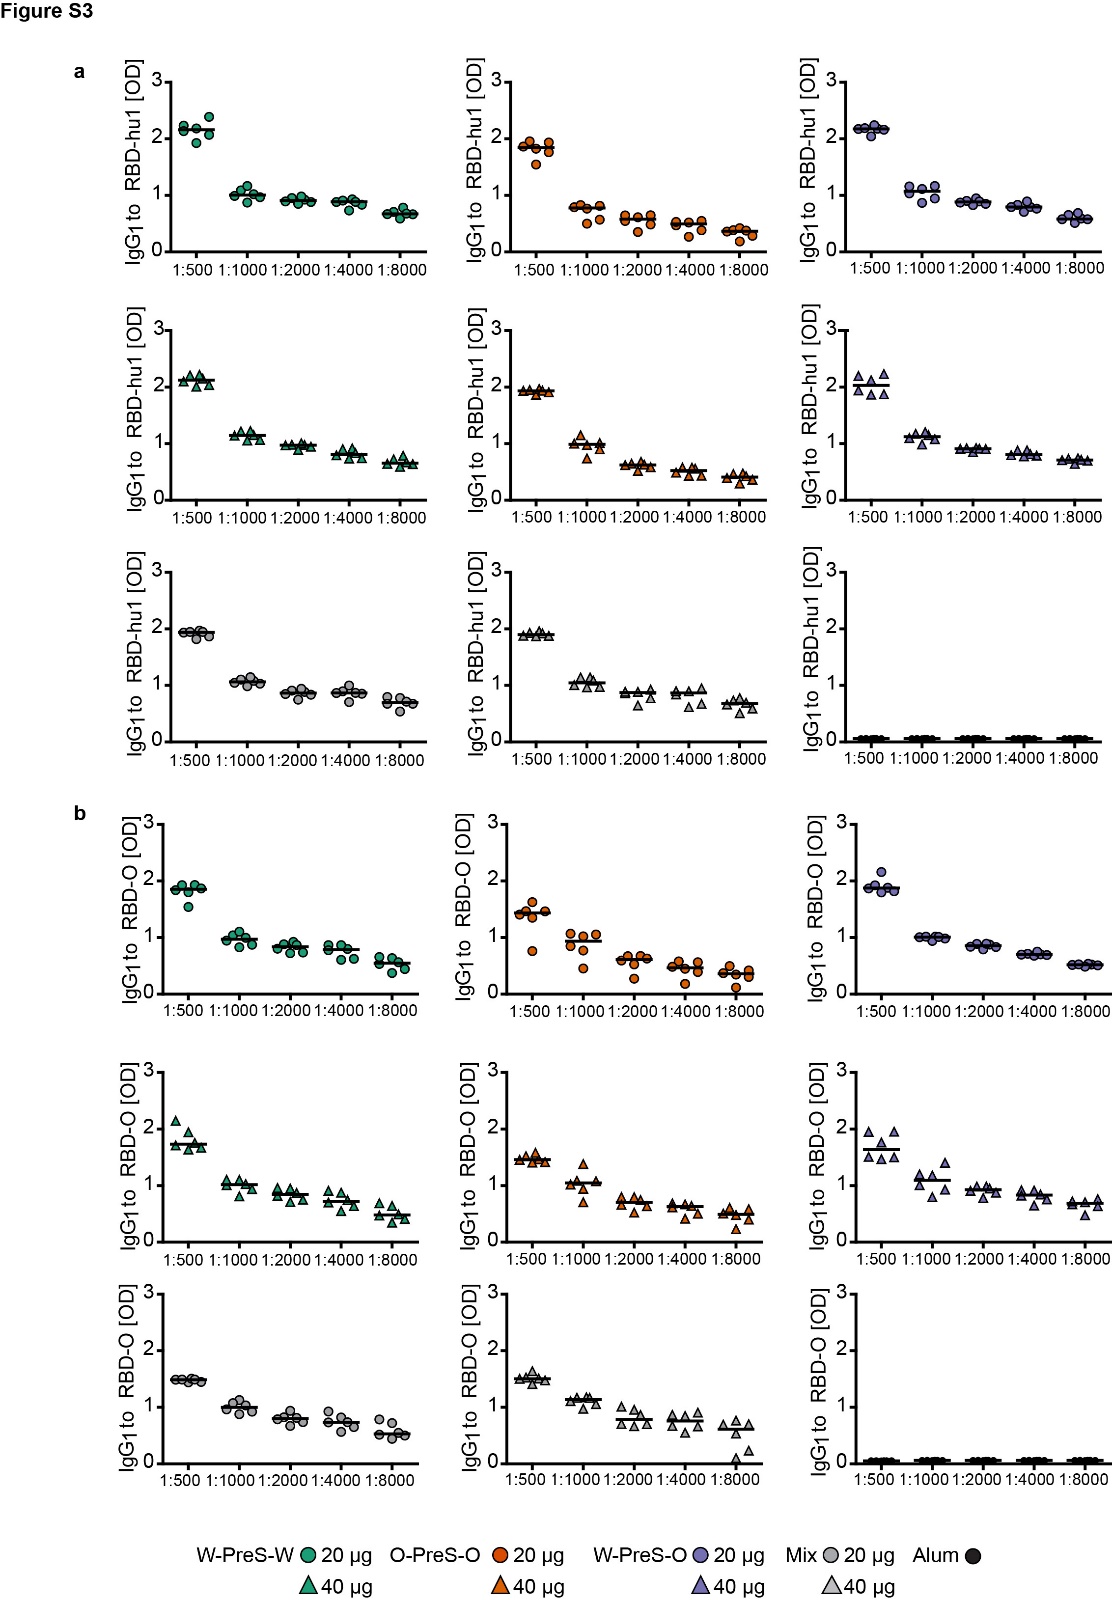
**

**Figure S3.** IgG1 levels specific for **(a**) RBD-hu1 and **(b)** RBD-Omicron of mice immunized with 20 µg (circles) or 40 µg (triangles) of the PreS-RBD fusion proteins as indicated below. Specific IgG1 levels were measured at indicated dilutions of serum samples (x-axes) and OD405/492 nm values corresponding to IgG1 levels are shown as duplicate determinations for each animal (n= 6 per group) with <5% deviation. Horizontal bars denote median antibody levels.


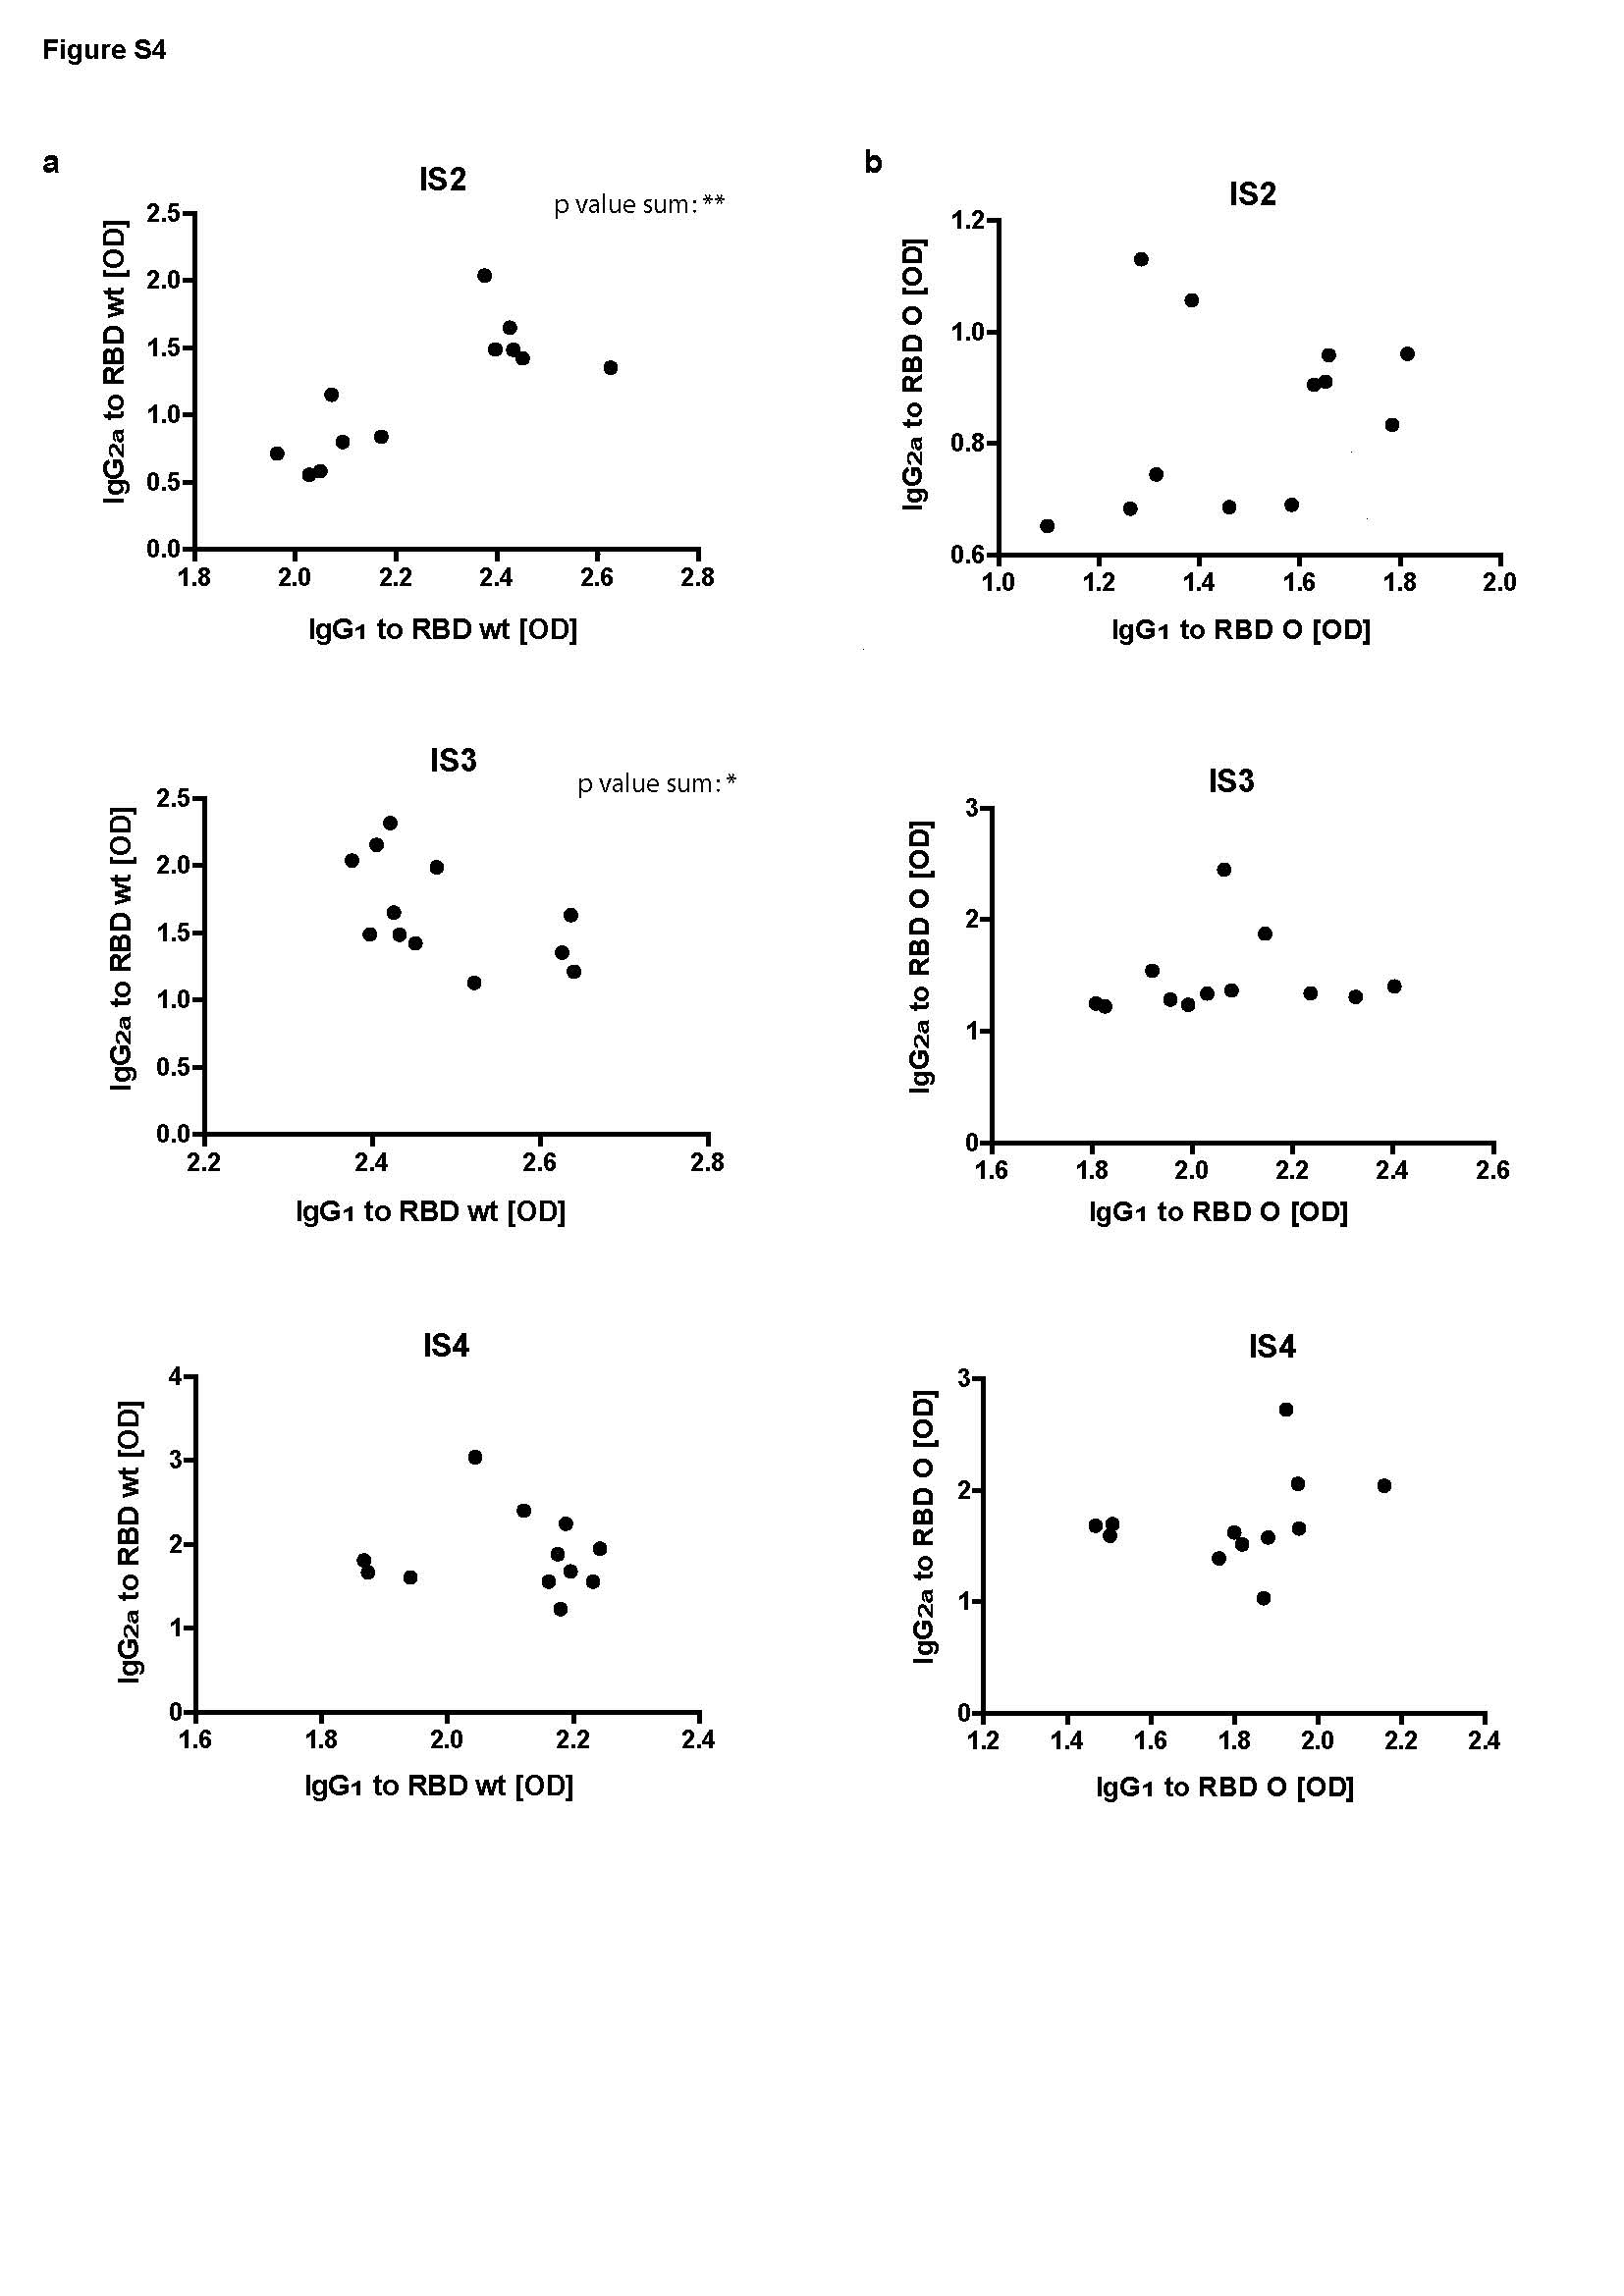


**Figure S4.** Correlation of IgG1 and IgG2a antibody levels specific for **(a)** RBD-hu1 and **(b)** RBD-Omicron of mice immunized with W-PreS-O at time points IS2, IS3 and IS4. Nonparametric Spearman´s correlation p values of <0.05 (* < 0.05, ** < 0.01) were considered as significant.

**
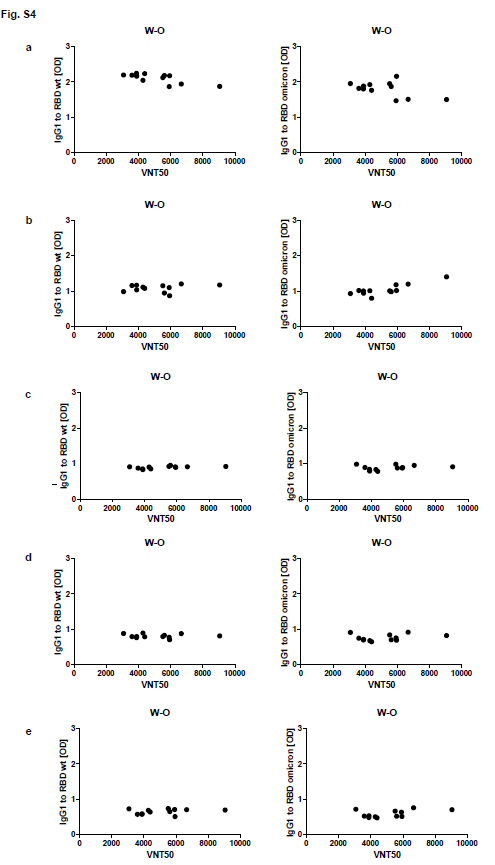
**

**Figure S5.** Lack of correlation of virus neutralization titers (VNT50, x-axes) in sera of mice (IS4) immunized with W-PreS-O (W-O) with levels of IgG1 antibodies (OD values, y-axis) to folded RBD-hu1 (left) and RBD-Omicron (right) measured at dilutions **(a)** 1:500, (**b)** 1:1000, (**c)** 1:2000, (**d)** 1:4000 and **(e)**1:8000.


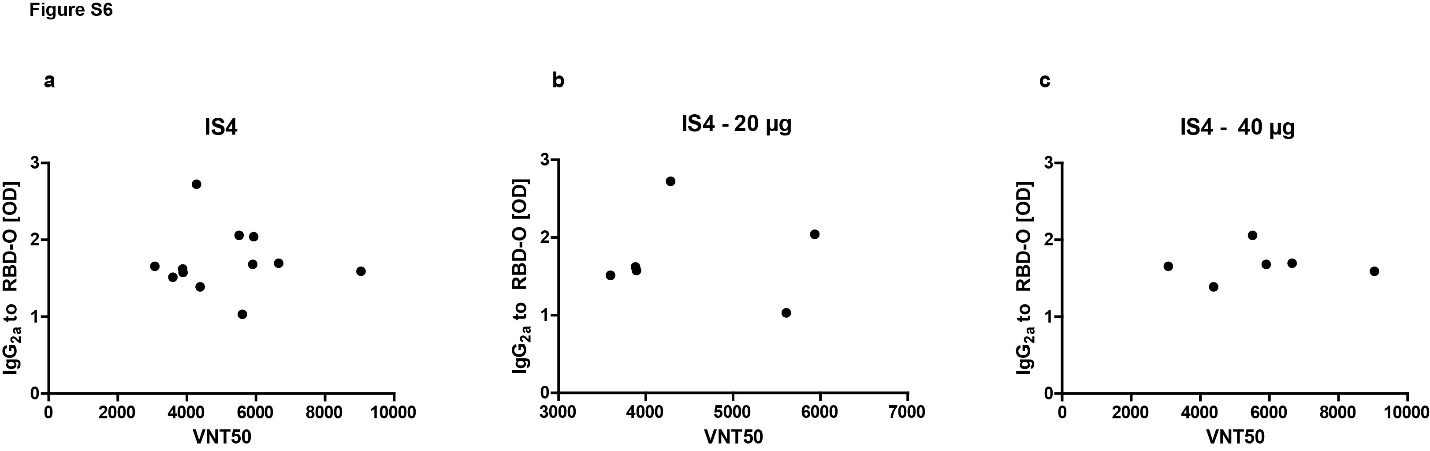


**Figure S6.** Lack of correlation of virus neutralization titers (VNT50, x-axes) in sera of mice (IS4) immunized with W-PreS-O with levels of IgG antibodies (OD values, y-axis) to folded RBD-Omicron measured at dilutions 1:500 of **(a)** both (20 µg and 40 µg) groups combined, **(b)** mice immunized with 20 µg and **(c)** mice immunized with 40 µg W-PreS-O.
